# Supplementary material for: Febrile neutropenia prophylaxis, G-CSF physician preferences: discrete-choice experiment
Source: HighWire-hosted journal article supplement (doi:10.1136/bmjspcare-2021-003082), 2021-10-27
Supplement: bmjspcare-2021-003082supp001_data_supplement.pdf [file bmjspcare-2021-003082supp001_data_supplement.pdf]

[Supplementary table S1](#) Discrete-choice experiment scenarios and attributes for assessing the physician preferences for G-CSF, as primary and secondary prophylaxis, in cancer patients treated with chemotherapy.

| Attribute                                                  | G-CSF treatment options A/B (for primary and secondary prophylaxis) |     |            |          |            |     |            |          |            |     |            |     |            |          |            |          |
|------------------------------------------------------------|---------------------------------------------------------------------|-----|------------|----------|------------|-----|------------|----------|------------|-----|------------|-----|------------|----------|------------|----------|
|                                                            | Scenario A                                                          |     | Scenario B |          | Scenario C |     | Scenario D |          | Scenario E |     | Scenario F |     | Scenario G |          | Scenario H |          |
|                                                            | A                                                                   | B   | A          | B        | A          | B   | A          | B        | A          | B   | A          | B   | A          | B        | A          | B        |
| <b>Pain at the injection site</b>                          | No                                                                  | Yes | Yes        | No       | No         | No  | Yes        | Yes      | No         | No  | No         | Yes | Yes        | No       | Yes        | Yes      |
| <b>Bone pain present</b>                                   | No                                                                  | No  | No         | Yes      | Yes        | No  | Yes        | No       | No         | Yes | Yes        | Yes | Yes        | No       | No         | Yes      |
| <b>Fever/flu syndrome present</b>                          | Yes                                                                 | No  | Yes        | Yes      | No         | Yes | Yes        | Yes      | No         | No  | Yes        | Yes | No         | No       | No         | No       |
| <b>Risk of febrile neutropenia with prophylaxis</b>        | Low                                                                 | Low | Moderate   | Moderate | Low        | Low | Low        | Moderate | Moderate   | Low | Moderate   | Low | Moderate   | Moderate | Low        | Moderate |
| <b>Biosimilar</b>                                          | No                                                                  | Yes | No         | Yes      | No         | No  | Yes        | No       | Yes        | No  | Yes        | Yes | No         | Yes      | Yes        | No       |
| <b>Number of injections per chemotherapy cycle</b>         | 5                                                                   | 1   | 1          | 1        | 1          | 5   | 10         | 1        | 10         | 1   | 1          | 10  | 5          | 10       | 1          | 5        |
| <b>Cost per injection, including cost of nurse (euros)</b> | 80                                                                  | 600 | 800        | 600      | 800        | 80  | 80         | 800      | 80         | 800 | 600        | 80  | 80         | 80       | 600        | 80       |
| For information: Overall cost for each cycle (euros)       | 400                                                                 | 600 | 800        | 600      | 800        | 400 | 800        | 800      | 800        | 800 | 600        | 800 | 400        | 800      | 600        | 400      |

**Supplementary table S2** Assignment of values to each choice for the attributes used in the discrete-choice experiment

| Discrete choice experiment attributes | Type of data | Choices for each attribute                                                             |
|---------------------------------------|--------------|----------------------------------------------------------------------------------------|
| <i>RISK_FN</i>                        | Binary       | 1 = Low risk of febrile neutropenia<br>0 = Moderate risk                               |
| <i>BIOSIMILAR</i>                     | Binary       | 1 = Treatment is biosimilar<br>0 = Treatment is not                                    |
| <i>CYCLE_COST</i>                     | Categorical  | 3 = Cost cycle 400€<br>2 = Cost cycle 600€<br>1 = Cost cycle 800€                      |
| <i>INJECTION_NUMBER</i>               | Categorical  | 3 = 1 injection per cycle<br>2 = 5 injections per cycle<br>1 = 10 injections per cycle |
| <i>INJECTION_SITE_PAIN</i>            | Binary       | 1 = No pain at injection site<br>0 = Pain at injection site                            |
| <i>BONE_PAIN</i>                      | Binary       | 1 = Absence of bone pain<br>0 = Presence of bone pain                                  |
| <i>INFLEUENZA_ILLNESS</i>             | Binary       | 1 = Absence of fever/flu syndrome<br>0 = Presence of fever/flu syndrome                |

**Supplementary table S3** Cancer patients treated by the participating physicians: overall and according to medical speciality

|                                             | Population analysed (n=205) | Medical oncologist (n=123) | Pulmonologist (oncology certified) (n=41) | Gastro-enterologist (oncology certified) (n=41) |
|---------------------------------------------|-----------------------------|----------------------------|-------------------------------------------|-------------------------------------------------|
| <b>Percentage of breast cancer patients</b> |                             |                            |                                           |                                                 |
| Mean (±SD)                                  | 25 (±31)                    | 42 (±30)                   | 0 (±0.2)                                  | 0.1 (±0.8)                                      |

|                                                |                               |                |                |                  |                |
|------------------------------------------------|-------------------------------|----------------|----------------|------------------|----------------|
|                                                | Median (range)                | 10 (0-100)     | 40 (0-100)     | 0 (0-1)          | 0 (0-5)        |
|                                                | Percentages classified, n (%) |                |                |                  |                |
|                                                | <25%                          | 121 (60)       | 40 (33)        | 40 (100)         | 41 (100)       |
|                                                | 25%-75%                       | 60 (30)        | 60 (50)        | 0 (0)            | 0 (0)          |
|                                                | >75%                          | 21 (10)        | 21 (17)        | 0 (0)            | 0 (0)          |
|                                                | Missing data                  | 3              | 2              | 1                | 0              |
| <b>Percentage of lung cancer patients</b>      |                               |                |                |                  |                |
|                                                | Mean ( $\pm$ SD)              | 28 ( $\pm$ 39) | 14 ( $\pm$ 18) | 100 ( $\pm$ 0.2) | 0 ( $\pm$ 0)   |
|                                                | Median (range)                | 10 (0-100)     | 10 (0-100)     | 100 (99-100)     | 0 (0-0)        |
|                                                | Percentages classified, n (%) |                |                |                  |                |
|                                                | <25%                          | 136 (67)       | 95 (79)        | 0 (0)            | 41 (0)         |
|                                                | 25%-75%                       | 24 (12)        | 24 (20)        | 0 (0)            | 0 (0)          |
|                                                | >75%                          | 42 (21)        | 2 (2)          | 40 (100)         | 0 (0)          |
|                                                | Missing data                  | 3              | 2              | 1                | 0              |
| <b>Percentage of digestive cancer patients</b> |                               |                |                |                  |                |
|                                                | Mean ( $\pm$ SD)              | 33 ( $\pm$ 39) | 22 ( $\pm$ 25) | 0% ( $\pm$ 0)    | 95 ( $\pm$ 19) |
|                                                | Median (range)                | 20 (0-100)     | 20 (0-100)     | 0% (0-0)         | 100 (25-100)   |
|                                                | Percentages classified, n (%) |                |                |                  |                |
|                                                | <25%                          | 118 (58)       | 78 (64)        | 40 (100)         | 0 (0)          |
|                                                | 25%-75%                       | 39 (19)        | 36 (30)        | 0 (0)            | 3 (7)          |
|                                                | >75%                          | 45 (22)        | 7 (6)          | 0 (0)            | 38 (93)        |
|                                                | Missing data                  | 3              | 2              | 1                | 0              |
| SD, standard deviation.                        |                               |                |                |                  |                |

**Supplementary table S4** Results of the analysis of physicians' G-CSF preferences, for primary and secondary prophylaxis, according to medical speciality

| G-CSF attribute                      |                                                     | Primary prophylaxis preference |         |                                                 |         |                                                       |         | Secondary prophylaxis preference<br>(exploratory analysis) |         |                                                 |         |                                                       |         |
|--------------------------------------|-----------------------------------------------------|--------------------------------|---------|-------------------------------------------------|---------|-------------------------------------------------------|---------|------------------------------------------------------------|---------|-------------------------------------------------|---------|-------------------------------------------------------|---------|
|                                      |                                                     | Medical oncologist<br>(n=123)  |         | Pulmonologist<br>(oncology certified)<br>(n=41) |         | Gastro-enterologist<br>(oncology certified)<br>(n=41) |         | Medical oncologist<br>(n=123)                              |         | Pulmonologist<br>(oncology certified)<br>(n=41) |         | Gastro-enterologist<br>(oncology certified)<br>(n=41) |         |
|                                      |                                                     | Coeff.                         | p-value | Coeff.                                          | p-value | Coeff.                                                | p-value | Coeff.                                                     | p-value | Coeff.                                          | p-value | Coeff.                                                | p-value |
| <b>Efficacy</b>                      |                                                     |                                |         |                                                 |         |                                                       |         |                                                            |         |                                                 |         |                                                       |         |
|                                      | Risk of febrile neutropenia with prophylaxis        | 0.043                          | 0.041   | 0.079                                           | 0.028   |                                                       |         |                                                            |         |                                                 |         | 0.110                                                 | 0.016   |
| <b>G-CSF characteristic</b>          |                                                     |                                |         |                                                 |         |                                                       |         |                                                            |         |                                                 |         |                                                       |         |
|                                      | Biosimilar                                          | 0.126                          | <0.001  | 0.099                                           | 0.009   | 0.223                                                 | <0.001  | 0.097                                                      | <0.001  | 0.104                                           | 0.014   | 0.160                                                 | <0.001  |
| <b>G-CSF administration and cost</b> |                                                     |                                |         |                                                 |         |                                                       |         |                                                            |         |                                                 |         |                                                       |         |
|                                      | Cost per injection, including cost of nurse (euros) | 0.132                          | <0.001  |                                                 |         | 0.131                                                 | <0.001  | 0.117                                                      | <0.001  | 0.071                                           | 0.003   | 0.107                                                 | <0.001  |
|                                      | Number of injections per chemotherapy cycle         | 0.186                          | <0.001  | 0.246                                           | <0.001  | 0.255                                                 | <0.001  | 0.113                                                      | <0.001  | 0.178                                           | <0.001  | 0.166                                                 | <0.001  |
| <b>Tolerance</b>                     |                                                     |                                |         |                                                 |         |                                                       |         |                                                            |         |                                                 |         |                                                       |         |
|                                      | Pain at the injection site                          | 0.092                          | <0.001  |                                                 |         | 0.079                                                 | 0.023   | 0.051                                                      | 0.019   |                                                 |         |                                                       |         |

|                                                                    |                            |                |           |  |  |  |  |                |           |                |           |  |  |
|--------------------------------------------------------------------|----------------------------|----------------|-----------|--|--|--|--|----------------|-----------|----------------|-----------|--|--|
|                                                                    | Bone pain present          | -<br>0.04<br>9 | 0.01<br>9 |  |  |  |  | -<br>0.06<br>9 | 0.00<br>2 | -<br>0.10<br>4 | 0.00<br>5 |  |  |
|                                                                    | Fever/flu syndrome present | -<br>0.06<br>5 | 0.00<br>2 |  |  |  |  | -<br>0.07<br>1 | 0.00<br>1 |                |           |  |  |
| Coef., coefficient; G-CSF, Granulocyte colony-stimulating factors. |                            |                |           |  |  |  |  |                |           |                |           |  |  |
