# Supplementary material for: Febrile neutropenia prophylaxis, G-CSF physician preferences: discrete-choice experiment
Source: HighWire-hosted journal article supplement (doi:10.1136/bmjspcare-2021-003082), 2021-10-27
Supplement: bmjspcare-2021-003082supp002_data_supplement.pdf [file bmjspcare-2021-003082supp002_data_supplement.pdf]

$$V_i = \beta_0 + \beta_1 RISK\_FN + \beta_2 BIOSIMILAR + \beta_3 CYCLE\_COST + \beta_4 INJECTIONS\_NUMBER \\ + \beta_5 INJECTION\_SITE\_PAIN + \beta_6 BONE\_PAIN + \beta_7 INFLUENZA\_ILLNESS + \eta_i$$

[Supplementary figure S1](#) Equation used to model the participant preferences in the discrete choice experiment (mixed logit model)

$V_i$  represents the utility (or satisfaction) brought by a treatment for user  $i$  as a combination of the treatment attributes.  $\beta_0$  is an intercept,  $\beta_1$  to  $\beta_7$  are coefficients associated with the treatment attributes and  $\eta_i$  is a random effect depending on user  $i$  personal preferences.

A) Medical oncologist primary prophylaxis preference

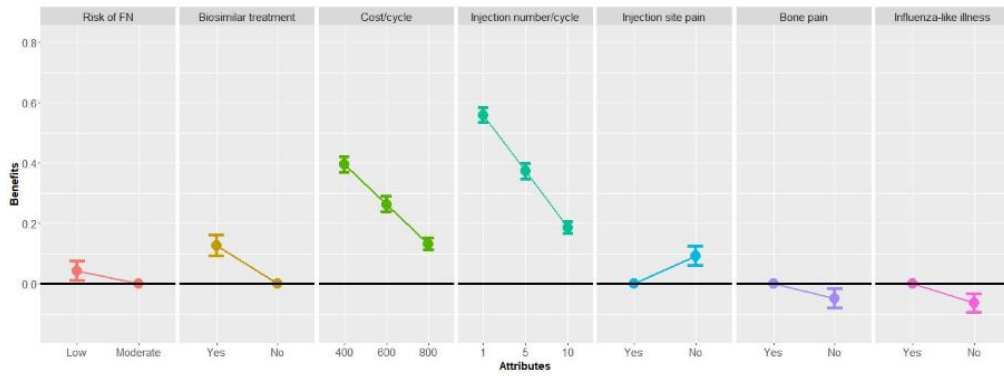

B) Pulmonologist (oncology certified) primary prophylaxis preference

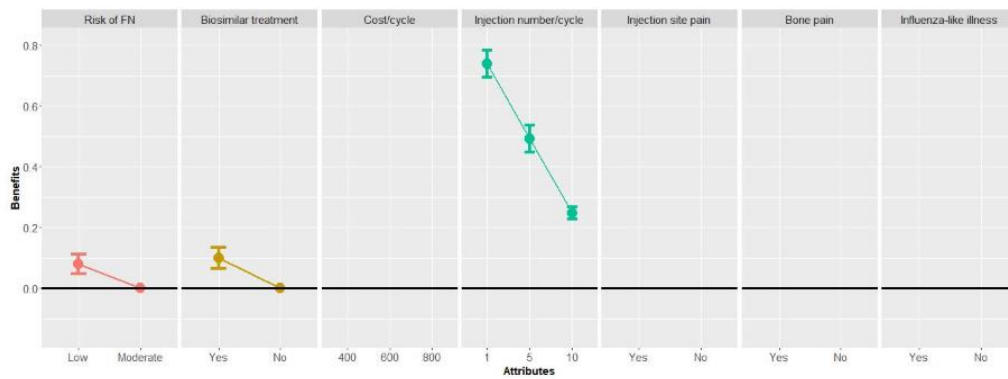

C) Gastro-enterologist (oncology certified) primary prophylaxis preference

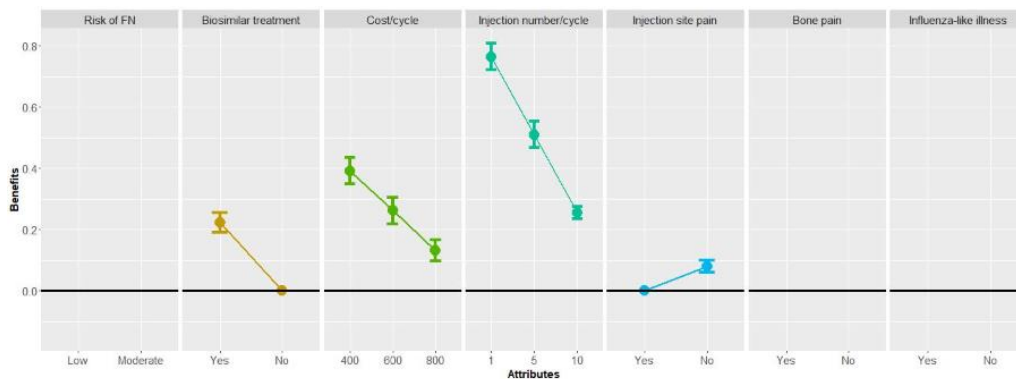

D) Medical oncologist secondary prophylaxis preference

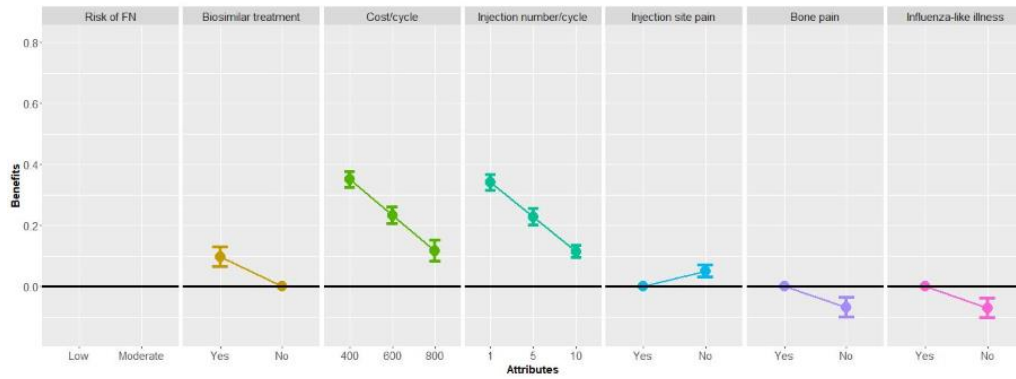

E) Pulmonologist (oncology certified) secondary prophylaxis preference

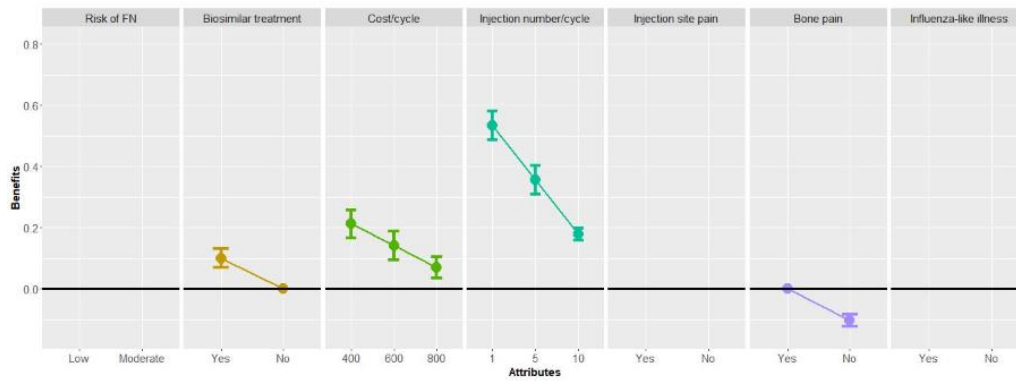

F) Gastro-enterologist (oncology certified) secondary prophylaxis preference

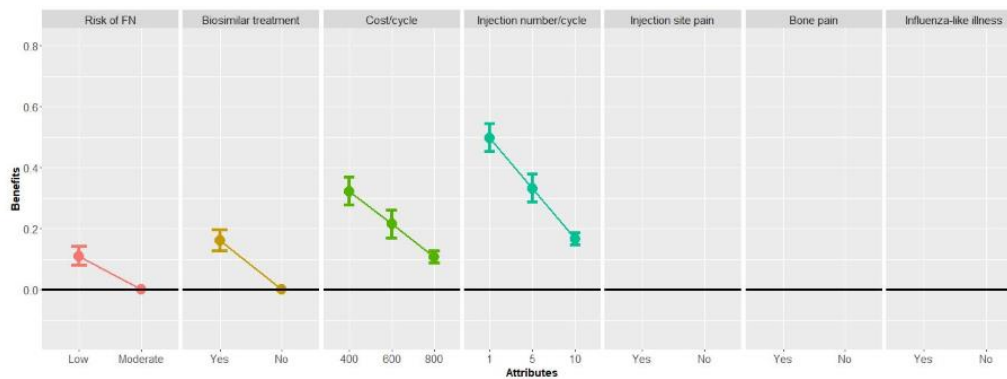

Supplementary figure S2 Analysis of the G-CSF preference, as primary (A-C) and secondary (D-F) prophylaxis, according to medical speciality
